# Supplementary material for: Environmental and Pharmacological Manipulations Blunt the Stress Response of Zebrafish in a Similar Manner
Source: PubMed Central journal article supplement (PMC4924565; doi:10.1038/srep28986), 2016-06-28
Supplement: srep28986-s1.pdf [file srep28986-s1.pdf]

UNIANOVA Cortisol BY Housing Environment Stress Drug

/METHOD=SSTYPE(3)

/INTERCEPT=INCLUDE

/EMMEANS=TABLES(OVERALL)

/PRINT=ETASQ DESCRIPTIVE

/CRITERIA=ALPHA(.05)

/DESIGN=Housing Environment Stress Drug Housing\*Environment Housing\*Stress Housing\*Drug Environment\*Stress Environment\*Drug Stress\*Drug Housing\*Environment\*Stress Housing\*Environment\*Drug Housing\*Stress\*Drug Environment\*Stress\*Drug Housing\*Environment\*Stress\*Drug.

## Univariate Analysis of Variance

[DataSet5] C:\Users\Angelo\Dropbox\UFRGS HOME\ORIENTAÇÕES\Ana Giacominni-UPF\Enriquecimento\DZP data.sav

### Between-Subjects Factors

|             |         | Value Label | N  |
|-------------|---------|-------------|----|
| Housing     | GRUPO   | GRUPO       | 72 |
|             | ISOLADO | ISOLADO     | 44 |
| Environment | EA-     | EA-         | 63 |
|             | EA+     | EA+         | 53 |
| Stress      | S-      | S-          | 53 |
|             | S+      | S+          | 63 |
| Drug        | 1       | Dzp0        | 53 |
|             | Dzp16   | Dzp16       | 63 |

### Descriptive Statistics

Dependent Variable: Cortisol

| Housing | Environment | Stress | Drug    | Mean     | Std. Deviation | N  |
|---------|-------------|--------|---------|----------|----------------|----|
| GRUPO   | EA-         | S-     | Dzp0    | 1,6000   | ,65192         | 5  |
|         |             |        | Dzp16   | 2,8182   | 2,26134        | 11 |
|         |             |        | Total   | 2,4375   | 1,96532        | 16 |
|         |             | S+     | Dzp0    | 58,8889  | 15,82280       | 9  |
|         |             |        | Dzp16   | 17,4545  | 6,38535        | 11 |
|         |             |        | Total   | 36,1000  | 23,96137       | 20 |
|         |             | Total  | Dzp0    | 38,4286  | 31,07550       | 14 |
|         |             |        | Dzp16   | 10,1364  | 8,82931        | 22 |
|         |             |        | Total   | 21,1389  | 24,51781       | 36 |
|         | EA+         | S-     | Dzp0    | 2,3333   | ,93095         | 6  |
|         |             |        | Dzp16   | 1,9000   | ,69921         | 10 |
|         |             |        | Total   | 2,0625   | ,79320         | 16 |
|         |             | S+     | Dzp0    | 13,2273  | 7,97923        | 11 |
|         |             |        | Dzp16   | 6,1944   | 3,18634        | 9  |
|         |             |        | Total   | 10,0625  | 7,11830        | 20 |
|         |             | Total  | Dzp0    | 9,3824   | 8,29821        | 17 |
|         |             |        | Dzp16   | 3,9342   | 3,10000        | 19 |
|         |             |        | Total   | 6,5069   | 6,63553        | 36 |
|         | Total       | S-     | Dzp0    | 2,0000   | ,86603         | 11 |
|         |             |        | Dzp16   | 2,3810   | 1,73136        | 21 |
|         |             |        | Total   | 2,2500   | 1,48650        | 32 |
| S+      |             | Dzp0   | 33,7750 | 26,11738 | 20             |    |
|         |             | Dzp16  | 12,3875 | 7,66592  | 20             |    |
|         |             | Total  | 23,0813 | 21,86852 | 40             |    |
| Total   |             | Dzp0   | 22,5000 | 25,90560 | 31             |    |
|         |             | Dzp16  | 7,2622  | 7,41998  | 41             |    |
|         |             | Total  | 13,8229 | 19,29535 | 72             |    |
| ISOLADO | EA-         | S-     | Dzp0    | 4,7957   | ,36395         | 7  |
|         |             |        | Dzp16   | 1,4167   | ,49160         | 6  |
|         |             |        | Total   | 3,2362   | 1,80028        | 13 |
|         |             | S+     | Dzp0    | 11,9167  | 2,31120        | 6  |
|         |             |        | Dzp16   | 22,5000  | 10,33717       | 8  |
|         |             |        | Total   | 17,9643  | 9,44104        | 14 |
|         |             | Total  | Dzp0    | 8,0823   | 3,99300        | 13 |
|         |             |        | Dzp16   | 13,4643  | 13,22362       | 14 |
|         |             |        | Total   | 10,8730  | 10,11437       | 27 |
|         | EA+         | S-     | Dzp0    | 2,3750   | ,85391         | 4  |
|         |             |        | Dzp16   | 2,1250   | ,94648         | 4  |
|         |             |        | Total   | 2,2500   | ,84515         | 8  |

### Descriptive Statistics

Dependent Variable: Cortisol

| Housing | Environment | Stress | Drug    | Mean     | Std. Deviation | N       |    |
|---------|-------------|--------|---------|----------|----------------|---------|----|
| Total   | Total       | S+     | Dzp0    | 10,2000  | 3,91472        | 5       |    |
|         |             |        | Dzp16   | 7,4375   | 4,46456        | 4       |    |
|         |             |        | Total   | 8,9722   | 4,15415        | 9       |    |
|         |             | Total  | Dzp0    | 6,7222   | 4,99444        | 9       |    |
|         |             |        | Dzp16   | 4,7813   | 4,12189        | 8       |    |
|         |             |        | Total   | 5,8088   | 4,57193        | 17      |    |
|         |             | S-     | Dzp0    | 3,9155   | 1,33784        | 11      |    |
|         |             |        | Dzp16   | 1,7000   | ,75277         | 10      |    |
|         |             |        | Total   | 2,8605   | 1,56058        | 21      |    |
|         | S+          | Dzp0   | 11,1364 | 3,09912  | 11             |         |    |
|         |             | Dzp16  | 17,4792 | 11,33301 | 12             |         |    |
|         |             | Total  | 14,4457 | 8,89265  | 23             |         |    |
|         | Total       | Dzp0   | 7,5259  | 4,36830  | 22             |         |    |
|         |             | Dzp16  | 10,3068 | 11,49739 | 22             |         |    |
|         |             | Total  | 8,9164  | 8,70950  | 44             |         |    |
|         | Total       | EA-    | S-      | Dzp0     | 3,4642         | 1,71309 | 12 |
|         |             |        |         | Dzp16    | 2,3235         | 1,93602 | 17 |
|         |             |        |         | Total    | 2,7955         | 1,90305 | 29 |
| S+      |             |        | Dzp0    | 40,1000  | 26,68948       | 15      |    |
|         |             |        | Dzp16   | 19,5789  | 8,41174        | 19      |    |
|         |             |        | Total   | 28,6324  | 21,16039       | 34      |    |
| Total   |             |        | Dzp0    | 23,8174  | 26,99913       | 27      |    |
|         |             |        | Dzp16   | 11,4306  | 10,69723       | 36      |    |
|         |             |        | Total   | 16,7392  | 20,21063       | 63      |    |
| EA+     |             | S-     | Dzp0    | 2,3500   | ,85147         | 10      |    |
|         |             |        | Dzp16   | 1,9643   | ,74587         | 14      |    |
|         |             |        | Total   | 2,1250   | ,79741         | 24      |    |
|         |             | S+     | Dzp0    | 12,2812  | 6,97369        | 16      |    |
|         |             |        | Dzp16   | 6,5769   | 3,47968        | 13      |    |
|         |             |        | Total   | 9,7241   | 6,29106        | 29      |    |
|         |             | Total  | Dzp0    | 8,4615   | 7,32929        | 26      |    |
|         |             |        | Dzp16   | 4,1852   | 3,37382        | 27      |    |
|         |             |        | Total   | 6,2830   | 6,01461        | 53      |    |
| Total   | S-          | Dzp0   | 2,9577  | 1,47321  | 22             |         |    |
|         |             | Dzp16  | 2,1613  | 1,50769  | 31             |         |    |
|         |             | Total  | 2,4919  | 1,53130  | 53             |         |    |
|         | S+          | Dzp0   | 25,7419 | 23,58915 | 31             |         |    |
|         |             | Dzp16  | 14,2969 | 9,37362  | 32             |         |    |
|         |             | Total  | 19,9286 | 18,61313 | 63             |         |    |

### Descriptive Statistics

Dependent Variable: Cortisol

| Housing | Environment | Stress | Drug  | Mean    | Std. Deviation | N   |
|---------|-------------|--------|-------|---------|----------------|-----|
|         |             | Total  | Dzp0  | 16,2843 | 21,22182       | 53  |
|         |             |        | Dzp16 | 8,3254  | 9,07936        | 63  |
|         |             | Total  |       | 11,9618 | 16,24629       | 116 |

### Tests of Between-Subjects Effects

Dependent Variable: Cortisol

| Source                                | Type III Sum of Squares | df  | Mean Square | F       | Sig. |
|---------------------------------------|-------------------------|-----|-------------|---------|------|
| Corrected Model                       | 26260,540 <sup>a</sup>  | 15  | 1750,703    | 42,775  | ,000 |
| Intercept                             | 11123,111               | 1   | 11123,111   | 271,774 | ,000 |
| Housing                               | 690,357                 | 1   | 690,357     | 16,868  | ,000 |
| Environment                           | 2274,379                | 1   | 2274,379    | 55,571  | ,000 |
| Stress                                | 6566,679                | 1   | 6566,679    | 160,446 | ,000 |
| Drug                                  | 752,715                 | 1   | 752,715     | 18,391  | ,000 |
| Housing * Environment                 | 593,408                 | 1   | 593,408     | 14,499  | ,000 |
| Housing * Stress                      | 833,754                 | 1   | 833,754     | 20,371  | ,000 |
| Housing * Drug                        | 1070,884                | 1   | 1070,884    | 26,165  | ,000 |
| Environment * Stress                  | 2051,795                | 1   | 2051,795    | 50,132  | ,000 |
| Environment * Drug                    | 202,063                 | 1   | 202,063     | 4,937   | ,029 |
| Stress * Drug                         | 568,688                 | 1   | 568,688     | 13,895  | ,000 |
| Housing * Environment * Stress        | 691,018                 | 1   | 691,018     | 16,884  | ,000 |
| Housing * Environment * Drug          | 734,694                 | 1   | 734,694     | 17,951  | ,000 |
| Housing * Stress * Drug               | 1466,377                | 1   | 1466,377    | 35,828  | ,000 |
| Environment * Stress * Drug           | 152,540                 | 1   | 152,540     | 3,727   | ,056 |
| Housing * Environment * Stress * Drug | 1098,048                | 1   | 1098,048    | 26,829  | ,000 |
| Error                                 | 4092,773                | 100 | 40,928      |         |      |
| Total                                 | 46951,162               | 116 |             |         |      |
| Corrected Total                       | 30353,313               | 115 |             |         |      |

### Tests of Between-Subjects Effects

Dependent Variable: Cortisol

| Source                                | Partial Eta Squared |
|---------------------------------------|---------------------|
| Corrected Model                       | ,865                |
| Intercept                             | ,731                |
| Housing                               | ,144                |
| Environment                           | ,357                |
| Stress                                | ,616                |
| Drug                                  | ,155                |
| Housing * Environment                 | ,127                |
| Housing * Stress                      | ,169                |
| Housing * Drug                        | ,207                |
| Environment * Stress                  | ,334                |
| Environment * Drug                    | ,047                |
| Stress * Drug                         | ,122                |
| Housing * Environment * Stress        | ,144                |
| Housing * Environment * Drug          | ,152                |
| Housing * Stress * Drug               | ,264                |
| Environment * Stress * Drug           | ,036                |
| Housing * Environment * Stress * Drug | ,212                |
| Error                                 |                     |
| Total                                 |                     |
| Corrected Total                       |                     |

a. R Squared = ,865 (Adjusted R Squared = ,845)

### Estimated Marginal Means

#### Grand Mean

Dependent Variable: Cortisol

| Mean   | Std. Error | 95% Confidence Interval |             |
|--------|------------|-------------------------|-------------|
|        |            | Lower Bound             | Upper Bound |
| 10,449 | ,634       | 9,191                   | 11,706      |

UNIANOVA Cortisol BY Grupo

/METHOD=SSTYPE(3)

/INTERCEPT=INCLUDE

/POSTHOC=Grupo(TUKEY)

/EMMEANS=TABLES(OVERALL)

/PRINT=ETASQ DESCRIPTIVE

/CRITERIA=ALPHA(.05)

/DESIGN=Grupo.

## Univariate Analysis of Variance

[DataSet5] C:\Users\Angelo\Dropbox\UFRGS HOME\ORIENTAÇÕES\Ana Giacominni-UPF\Enriquecimento\DZP data.sav

### Between-Subjects Factors

|       |          | Value Label | N  |
|-------|----------|-------------|----|
| Grupo | GEA-S-cr | GEA-S-cr    | 5  |
|       | GEA-S-D  | GEA-S-D     | 11 |
|       | GEA-S+cr | GEA-S+cr    | 9  |
|       | GEA-S+D  | GEA-S+D     | 11 |
|       | GEA+S-cr | GEA+S-cr    | 6  |
|       | GEA+S-D  | GEA+S-D     | 10 |
|       | GEA+S+cr | GEA+S+cr    | 11 |
|       | GEA+S+D  | GEA+S+D     | 9  |
|       | IEA-S-cr | IEA-S-cr    | 7  |
|       | IEA-S-D  | IEA-S-D     | 6  |
|       | IEA-S+cr | IEA-S+cr    | 6  |
|       | IEA-S+D  | IEA-S+D     | 8  |
|       | IEA+S-cr | IEA+S-cr    | 4  |
|       | IEA+S-D  | IEA+S-D     | 4  |
|       | IEA+S+cr | IEA+S+cr    | 5  |
|       | IEA+S+D  | IEA+S+D     | 4  |

### Descriptive Statistics

Dependent Variable: Cortisol

| Grupo    | Mean    | Std. Deviation | N   |
|----------|---------|----------------|-----|
| GEA-S-cr | 1,6000  | ,65192         | 5   |
| GEA-S-D  | 2,8182  | 2,26134        | 11  |
| GEA-S+cr | 58,8889 | 15,82280       | 9   |
| GEA-S+D  | 17,4545 | 6,38535        | 11  |
| GEA+S-cr | 2,3333  | ,93095         | 6   |
| GEA+S-D  | 1,9000  | ,69921         | 10  |
| GEA+S+cr | 13,2273 | 7,97923        | 11  |
| GEA+S+D  | 6,1944  | 3,18634        | 9   |
| IEA-S-cr | 4,7957  | ,36395         | 7   |
| IEA-S-D  | 1,4167  | ,49160         | 6   |
| IEA-S+cr | 11,9167 | 2,31120        | 6   |
| IEA-S+D  | 22,5000 | 10,33717       | 8   |
| IEA+S-cr | 2,3750  | ,85391         | 4   |
| IEA+S-D  | 2,1250  | ,94648         | 4   |
| IEA+S+cr | 10,2000 | 3,91472        | 5   |
| IEA+S+D  | 7,4375  | 4,46456        | 4   |
| Total    | 11,9618 | 16,24629       | 116 |

### Tests of Between-Subjects Effects

Dependent Variable: Cortisol

| Source          | Type III Sum of Squares | df  | Mean Square | F       | Sig. | Partial Eta Squared |
|-----------------|-------------------------|-----|-------------|---------|------|---------------------|
| Corrected Model | 26260,540 <sup>a</sup>  | 15  | 1750,703    | 42,775  | ,000 | ,865                |
| Intercept       | 11123,111               | 1   | 11123,111   | 271,774 | ,000 | ,731                |
| Grupo           | 26260,540               | 15  | 1750,703    | 42,775  | ,000 | ,865                |
| Error           | 4092,773                | 100 | 40,928      |         |      |                     |
| Total           | 46951,162               | 116 |             |         |      |                     |
| Corrected Total | 30353,313               | 115 |             |         |      |                     |

a. R Squared = ,865 (Adjusted R Squared = ,845)

### Estimated Marginal Means

#### Grand Mean

Dependent Variable: Cortisol

| Mean   | Std. Error | 95% Confidence Interval |             |
|--------|------------|-------------------------|-------------|
|        |            | Lower Bound             | Upper Bound |
| 10,449 | ,634       | 9,191                   | 11,706      |

### Post Hoc Tests

#### Grupo

**Multiple Comparisons**

Dependent Variable: Cortisol

Tukey HSD

| (I) Grupo | (J) Grupo | Mean Difference (I-J) | Std. Error | Sig.  | 95% Confidence Interval |             |
|-----------|-----------|-----------------------|------------|-------|-------------------------|-------------|
|           |           |                       |            |       | Lower Bound             | Upper Bound |
| GEA-S-cr  | GEA-S-D   | -1,2182               | 3,45054    | 1,000 | -13,3467                | 10,9104     |
|           | GEA-S+cr  | -57,2889*             | 3,56834    | ,000  | -69,8315                | -44,7463    |
|           | GEA-S+D   | -15,8545*             | 3,45054    | ,001  | -27,9831                | -3,7260     |
|           | GEA+S-cr  | -,7333                | 3,87387    | 1,000 | -14,3498                | 12,8832     |
|           | GEA+S-D   | -,3000                | 3,50404    | 1,000 | -12,6166                | 12,0166     |
|           | GEA+S+cr  | -11,6273              | 3,45054    | ,075  | -23,7558                | ,5013       |
|           | GEA+S+D   | -4,5944               | 3,56834    | ,996  | -17,1371                | 7,9482      |
|           | IEA-S-cr  | -3,1957               | 3,74598    | 1,000 | -16,3627                | 9,9713      |
|           | IEA-S-D   | ,1833                 | 3,87387    | 1,000 | -13,4332                | 13,7998     |
|           | IEA-S+cr  | -10,3167              | 3,87387    | ,369  | -23,9332                | 3,2998      |
|           | IEA-S+D   | -20,9000*             | 3,64712    | ,000  | -33,7195                | -8,0805     |
|           | IEA+S-cr  | -,7750                | 4,29156    | 1,000 | -15,8597                | 14,3097     |
|           | IEA+S-D   | -,5250                | 4,29156    | 1,000 | -15,6097                | 14,5597     |
|           | IEA+S+cr  | -8,6000               | 4,04612    | ,744  | -22,8220                | 5,6220      |
|           | IEA+S+D   | -5,8375               | 4,29156    | ,992  | -20,9222                | 9,2472      |
| GEA-S-D   | GEA-S-cr  | 1,2182                | 3,45054    | 1,000 | -10,9104                | 13,3467     |
|           | GEA-S+cr  | -56,0707*             | 2,87545    | ,000  | -66,1778                | -45,9636    |
|           | GEA-S+D   | -14,6364*             | 2,72789    | ,000  | -24,2248                | -5,0479     |
|           | GEA+S-cr  | ,4848                 | 3,24684    | 1,000 | -10,9277                | 11,8974     |
|           | GEA+S-D   | ,9182                 | 2,79526    | 1,000 | -8,9071                 | 10,7434     |
|           | GEA+S+cr  | -10,4091*             | 2,72789    | ,020  | -19,9975                | -,8206      |
|           | GEA+S+D   | -3,3763               | 2,87545    | ,998  | -13,4834                | 6,7309      |
|           | IEA-S-cr  | -1,9775               | 3,09314    | 1,000 | -12,8498                | 8,8948      |
|           | IEA-S-D   | 1,4015                | 3,24684    | 1,000 | -10,0110                | 12,8141     |
|           | IEA-S+cr  | -9,0985               | 3,24684    | ,285  | -20,5110                | 2,3141      |
|           | IEA-S+D   | -19,6818*             | 2,97265    | ,000  | -30,1306                | -9,2330     |
|           | IEA+S-cr  | ,4432                 | 3,73532    | 1,000 | -12,6864                | 13,5727     |
|           | IEA+S-D   | ,6932                 | 3,73532    | 1,000 | -12,4364                | 13,8227     |
|           | IEA+S+cr  | -7,3818               | 3,45054    | ,735  | -19,5104                | 4,7467      |
|           | IEA+S+D   | -4,6193               | 3,73532    | ,997  | -17,7489                | 8,5102      |
| GEA-S+cr  | GEA-S-cr  | 57,2889*              | 3,56834    | ,000  | 44,7463                 | 69,8315     |
|           | GEA-S-D   | 56,0707*              | 2,87545    | ,000  | 45,9636                 | 66,1778     |
|           | GEA-S+D   | 41,4343*              | 2,87545    | ,000  | 31,3272                 | 51,5415     |
|           | GEA+S-cr  | 56,5556*              | 3,37177    | ,000  | 44,7039                 | 68,4072     |
|           | GEA+S-D   | 56,9889*              | 2,93944    | ,000  | 46,6569                 | 67,3209     |
|           | GEA+S+cr  | 45,6616*              | 2,87545    | ,000  | 35,5545                 | 55,7687     |
|           | GEA+S+D   | 52,6944*              | 3,01580    | ,000  | 42,0940                 | 63,2949     |
|           | IEA-S-cr  | 54,0932*              | 3,22403    | ,000  | 42,7608                 | 65,4255     |
|           | IEA-S-D   | 57,4722*              | 3,37177    | ,000  | 45,6206                 | 69,3239     |



**Multiple Comparisons**

Dependent Variable: Cortisol

Tukey HSD

| (I) Grupo | (J) Grupo | Mean Difference (I-J) | Std. Error | Sig.     | 95% Confidence Interval |             |
|-----------|-----------|-----------------------|------------|----------|-------------------------|-------------|
|           |           |                       |            |          | Lower Bound             | Upper Bound |
| GEA-S+D   | IEA-S+cr  | 46,9722*              | 3,37177    | ,000     | 35,1206                 | 58,8239     |
|           | IEA-S+D   | 36,3889*              | 3,10862    | ,000     | 25,4622                 | 47,3156     |
|           | IEA+S-cr  | 56,5139*              | 3,84441    | ,000     | 43,0009                 | 70,0269     |
|           | IEA+S-D   | 56,7639*              | 3,84441    | ,000     | 43,2509                 | 70,2769     |
|           | IEA+S+cr  | 48,6889*              | 3,56834    | ,000     | 36,1463                 | 61,2315     |
|           | IEA+S+D   | 51,4514*              | 3,84441    | ,000     | 37,9384                 | 64,9644     |
|           | GEA-S-cr  | 15,8545*              | 3,45054    | ,001     | 3,7260                  | 27,9831     |
|           | GEA-S-D   | 14,6364*              | 2,72789    | ,000     | 5,0479                  | 24,2248     |
|           | GEA-S+cr  | -41,4343*             | 2,87545    | ,000     | -51,5415                | -31,3272    |
|           | GEA+S-cr  | 15,1212*              | 3,24684    | ,001     | 3,7087                  | 26,5338     |
|           | GEA+S-D   | 15,5545*              | 2,79526    | ,000     | 5,7293                  | 25,3798     |
|           | GEA+S+cr  | 4,2273                | 2,72789    | ,973     | -5,3612                 | 13,8157     |
|           | GEA+S+D   | 11,2601*              | 2,87545    | ,015     | 1,1530                  | 21,3672     |
|           | IEA-S-cr  | 12,6588*              | 3,09314    | ,008     | 1,7865                  | 23,5311     |
|           | IEA-S-D   | 16,0379*              | 3,24684    | ,000     | 4,6253                  | 27,4504     |
|           | IEA-S+cr  | 5,5379                | 3,24684    | ,941     | -5,8747                 | 16,9504     |
|           | IEA-S+D   | -5,0455               | 2,97265    | ,943     | -15,4942                | 5,4033      |
|           | IEA+S-cr  | 15,0795*              | 3,73532    | ,010     | 1,9500                  | 28,2091     |
|           | IEA+S-D   | 15,3295*              | 3,73532    | ,008     | 2,2000                  | 28,4591     |
|           | IEA+S+cr  | 7,2545                | 3,45054    | ,759     | -4,8740                 | 19,3831     |
| IEA+S+D   | 10,0170   | 3,73532               | ,357       | -3,1125  | 23,1466                 |             |
| GEA+S-cr  | GEA-S-cr  | ,7333                 | 3,87387    | 1,000    | -12,8832                | 14,3498     |
|           | GEA-S-D   | -,4848                | 3,24684    | 1,000    | -11,8974                | 10,9277     |
|           | GEA-S+cr  | -56,5556*             | 3,37177    | ,000     | -68,4072                | -44,7039    |
|           | GEA-S+D   | -15,1212*             | 3,24684    | ,001     | -26,5338                | -3,7087     |
|           | GEA+S-D   | ,4333                 | 3,30364    | 1,000    | -11,1789                | 12,0455     |
|           | GEA+S+cr  | -10,8939              | 3,24684    | ,078     | -22,3065                | ,5186       |
|           | GEA+S+D   | -3,8611               | 3,37177    | ,999     | -15,7128                | 7,9905      |
|           | IEA-S-cr  | -2,4624               | 3,55923    | 1,000    | -14,9730                | 10,0482     |
|           | IEA-S-D   | ,9167                 | 3,69359    | 1,000    | -12,0662                | 13,8995     |
|           | IEA-S+cr  | -9,5833               | 3,69359    | ,414     | -22,5662                | 3,3995      |
|           | IEA-S+D   | -20,1667*             | 3,45503    | ,000     | -32,3110                | -8,0223     |
|           | IEA+S-cr  | -,0417                | 4,12955    | 1,000    | -14,5569                | 14,4736     |
|           | IEA+S-D   | ,2083                 | 4,12955    | 1,000    | -14,3069                | 14,7236     |
|           | IEA+S+cr  | -7,8667               | 3,87387    | ,802     | -21,4832                | 5,7498      |
| IEA+S+D   | -5,1042   | 4,12955               | ,997       | -19,6194 | 9,4111                  |             |
| GEA+S-D   | GEA-S-cr  | ,3000                 | 3,50404    | 1,000    | -12,0166                | 12,6166     |
|           | GEA-S-D   | -,9182                | 2,79526    | 1,000    | -10,7434                | 8,9071      |
|           | GEA-S+cr  | -56,9889*             | 2,93944    | ,000     | -67,3209                | -46,6569    |

**Multiple Comparisons**

Dependent Variable: Cortisol

Tukey HSD

| (I) Grupo | (J) Grupo | Mean Difference (I-J) | Std. Error | Sig.     | 95% Confidence Interval |             |
|-----------|-----------|-----------------------|------------|----------|-------------------------|-------------|
|           |           |                       |            |          | Lower Bound             | Upper Bound |
| GEA+S+cr  | GEA-S+D   | -15,5545*             | 2,79526    | ,000     | -25,3798                | -5,7293     |
|           | GEA+S-cr  | -,4333                | 3,30364    | 1,000    | -12,0455                | 11,1789     |
|           | GEA+S+cr  | -11,3273*             | 2,79526    | ,009     | -21,1525                | -1,5020     |
|           | GEA+S+D   | -4,2944               | 2,93944    | ,984     | -14,6265                | 6,0376      |
|           | IEA-S-cr  | -2,8957               | 3,15271    | 1,000    | -13,9774                | 8,1860      |
|           | IEA-S-D   | ,4833                 | 3,30364    | 1,000    | -11,1289                | 12,0955     |
|           | IEA+S+cr  | -10,0167              | 3,30364    | ,175     | -21,6289                | 1,5955      |
|           | IEA+S+D   | -20,6000*             | 3,03459    | ,000     | -31,2665                | -9,9335     |
|           | IEA+S-cr  | -,4750                | 3,78480    | 1,000    | -13,7784                | 12,8284     |
|           | IEA+S-D   | -,2250                | 3,78480    | 1,000    | -13,5284                | 13,0784     |
|           | IEA+S+cr  | -8,3000               | 3,50404    | ,575     | -20,6166                | 4,0166      |
|           | IEA+S+D   | -5,5375               | 3,78480    | ,984     | -18,8409                | 7,7659      |
|           | GEA-S-cr  | 11,6273               | 3,45054    | ,075     | -,5013                  | 23,7558     |
|           | GEA-S-D   | 10,4091*              | 2,72789    | ,020     | ,8206                   | 19,9975     |
|           | GEA-S+cr  | -45,6616*             | 2,87545    | ,000     | -55,7687                | -35,5545    |
|           | GEA-S+D   | -4,2273               | 2,72789    | ,973     | -13,8157                | 5,3612      |
|           | GEA+S-cr  | 10,8939               | 3,24684    | ,078     | -,5186                  | 22,3065     |
|           | GEA+S-D   | 11,3273*              | 2,79526    | ,009     | 1,5020                  | 21,1525     |
|           | GEA+S+D   | 7,0328                | 2,87545    | ,519     | -3,0743                 | 17,1400     |
|           | IEA-S-cr  | 8,4316                | 3,09314    | ,330     | -2,4407                 | 19,3038     |
| IEA-S-D   | 11,8106*  | 3,24684               | ,035       | ,3981    | 23,2232                 |             |
| IEA+S+cr  | 1,3106    | 3,24684               | 1,000      | -10,1019 | 12,7232                 |             |
| IEA+S+D   | -9,2727   | 2,97265               | ,143       | -19,7215 | 1,1761                  |             |
| IEA+S-cr  | 10,8523   | 3,73532               | ,231       | -2,2773  | 23,9818                 |             |
| IEA+S-D   | 11,1023   | 3,73532               | ,200       | -2,0273  | 24,2318                 |             |
| IEA+S+cr  | 3,0273    | 3,45054               | 1,000      | -9,1013  | 15,1558                 |             |
| IEA+S+D   | 5,7898    | 3,73532               | ,973       | -7,3398  | 18,9193                 |             |
| GEA+S+D   | GEA-S-cr  | 4,5944                | 3,56834    | ,996     | -7,9482                 | 17,1371     |
|           | GEA-S-D   | 3,3763                | 2,87545    | ,998     | -6,7309                 | 13,4834     |
|           | GEA-S+cr  | -52,6944*             | 3,01580    | ,000     | -63,2949                | -42,0940    |
|           | GEA-S+D   | -11,2601*             | 2,87545    | ,015     | -21,3672                | -1,1530     |
|           | GEA+S-cr  | 3,8611                | 3,37177    | ,999     | -7,9905                 | 15,7128     |
|           | GEA+S-D   | 4,2944                | 2,93944    | ,984     | -6,0376                 | 14,6265     |
|           | GEA+S+cr  | -7,0328               | 2,87545    | ,519     | -17,1400                | 3,0743      |
|           | IEA-S-cr  | 1,3987                | 3,22403    | 1,000    | -9,9336                 | 12,7311     |
|           | IEA-S-D   | 4,7778                | 3,37177    | ,988     | -7,0739                 | 16,6294     |
|           | IEA+S+cr  | -5,7222               | 3,37177    | ,943     | -17,5739                | 6,1294      |
|           | IEA+S+D   | -16,3056*             | 3,10862    | ,000     | -27,2322                | -5,3789     |
|           | IEA+S-cr  | 3,8194                | 3,84441    | 1,000    | -9,6935                 | 17,3324     |

**Multiple Comparisons**

Dependent Variable: Cortisol

Tukey HSD

| (I) Grupo | (J) Grupo | Mean Difference (I-J) | Std. Error | Sig.  | 95% Confidence Interval |             |
|-----------|-----------|-----------------------|------------|-------|-------------------------|-------------|
|           |           |                       |            |       | Lower Bound             | Upper Bound |
| IEA-S-cr  | IEA+S-D   | 4,0694                | 3,84441    | ,999  | -9,4435                 | 17,5824     |
|           | IEA+S+cr  | -4,0056               | 3,56834    | ,999  | -16,5482                | 8,5371      |
|           | IEA+S+D   | -1,2431               | 3,84441    | 1,000 | -14,7560                | 12,2699     |
|           | GEA-S-cr  | 3,1957                | 3,74598    | 1,000 | -9,9713                 | 16,3627     |
|           | GEA-S-D   | 1,9775                | 3,09314    | 1,000 | -8,8948                 | 12,8498     |
|           | GEA-S+cr  | -54,0932*             | 3,22403    | ,000  | -65,4255                | -42,7608    |
|           | GEA-S+D   | -12,6588*             | 3,09314    | ,008  | -23,5311                | -1,7865     |
|           | GEA+S-cr  | 2,4624                | 3,55923    | 1,000 | -10,0482                | 14,9730     |
|           | GEA+S-D   | 2,8957                | 3,15271    | 1,000 | -8,1860                 | 13,9774     |
|           | GEA+S+cr  | -8,4316               | 3,09314    | ,330  | -19,3038                | 2,4407      |
|           | GEA+S+D   | -1,3987               | 3,22403    | 1,000 | -12,7311                | 9,9336      |
|           | IEA-S-D   | 3,3790                | 3,55923    | 1,000 | -9,1315                 | 15,8896     |
|           | IEA-S+cr  | -7,1210               | 3,55923    | ,819  | -19,6315                | 5,3896      |
|           | IEA-S+D   | -17,7043*             | 3,31101    | ,000  | -29,3424                | -6,0662     |
|           | IEA+S-cr  | 2,4207                | 4,00983    | 1,000 | -11,6737                | 16,5151     |
|           | IEA+S-D   | 2,6707                | 4,00983    | 1,000 | -11,4237                | 16,7651     |
|           | IEA+S+cr  | -5,4043               | 3,74598    | ,986  | -18,5713                | 7,7627      |
|           | IEA+S+D   | -2,6418               | 4,00983    | 1,000 | -16,7362                | 11,4526     |
| IEA-S-D   | GEA-S-cr  | -,1833                | 3,87387    | 1,000 | -13,7998                | 13,4332     |
|           | GEA-S-D   | -1,4015               | 3,24684    | 1,000 | -12,8141                | 10,0110     |
|           | GEA-S+cr  | -57,4722*             | 3,37177    | ,000  | -69,3239                | -45,6206    |
|           | GEA-S+D   | -16,0379*             | 3,24684    | ,000  | -27,4504                | -4,6253     |
|           | GEA+S-cr  | -,9167                | 3,69359    | 1,000 | -13,8995                | 12,0662     |
|           | GEA+S-D   | -,4833                | 3,30364    | 1,000 | -12,0955                | 11,1289     |
|           | GEA+S+cr  | -11,8106*             | 3,24684    | ,035  | -23,2232                | -,3981      |
|           | GEA+S+D   | -4,7778               | 3,37177    | ,988  | -16,6294                | 7,0739      |
|           | IEA-S-cr  | -3,3790               | 3,55923    | 1,000 | -15,8896                | 9,1315      |
|           | IEA-S+cr  | -10,5000              | 3,69359    | ,263  | -23,4828                | 2,4828      |
|           | IEA-S+D   | -21,0833*             | 3,45503    | ,000  | -33,2277                | -8,9390     |
|           | IEA+S-cr  | -,9583                | 4,12955    | 1,000 | -15,4736                | 13,5569     |
|           | IEA+S-D   | -,7083                | 4,12955    | 1,000 | -15,2236                | 13,8069     |
|           | IEA+S+cr  | -8,7833               | 3,87387    | ,648  | -22,3998                | 4,8332      |
|           | IEA+S+D   | -6,0208               | 4,12955    | ,985  | -20,5361                | 8,4944      |
| IEA-S+cr  | GEA-S-cr  | 10,3167               | 3,87387    | ,369  | -3,2998                 | 23,9332     |
|           | GEA-S-D   | 9,0985                | 3,24684    | ,285  | -2,3141                 | 20,5110     |
|           | GEA-S+cr  | -46,9722*             | 3,37177    | ,000  | -58,8239                | -35,1206    |
|           | GEA-S+D   | -5,5379               | 3,24684    | ,941  | -16,9504                | 5,8747      |
|           | GEA+S-cr  | 9,5833                | 3,69359    | ,414  | -3,3995                 | 22,5662     |
|           | GEA+S-D   | 10,0167               | 3,30364    | ,175  | -1,5955                 | 21,6289     |

**Multiple Comparisons**

Dependent Variable: Cortisol

Tukey HSD

| (I) Grupo | (J) Grupo | Mean Difference (I-J) | Std. Error | Sig.    | 95% Confidence Interval |             |
|-----------|-----------|-----------------------|------------|---------|-------------------------|-------------|
|           |           |                       |            |         | Lower Bound             | Upper Bound |
| IEA-S+D   | GEA+S+cr  | -1,3106               | 3,24684    | 1,000   | -12,7232                | 10,1019     |
|           | GEA+S+D   | 5,7222                | 3,37177    | ,943    | -6,1294                 | 17,5739     |
|           | IEA-S-cr  | 7,1210                | 3,55923    | ,819    | -5,3896                 | 19,6315     |
|           | IEA-S-D   | 10,5000               | 3,69359    | ,263    | -2,4828                 | 23,4828     |
|           | IEA-S+D   | -10,5833              | 3,45503    | ,163    | -22,7277                | 1,5610      |
|           | IEA+S-cr  | 9,5417                | 4,12955    | ,617    | -4,9736                 | 24,0569     |
|           | IEA+S-D   | 9,7917                | 4,12955    | ,573    | -4,7236                 | 24,3069     |
|           | IEA+S+cr  | 1,7167                | 3,87387    | 1,000   | -11,8998                | 15,3332     |
|           | IEA+S+D   | 4,4792                | 4,12955    | ,999    | -10,0361                | 18,9944     |
|           | GEA-S-cr  | 20,9000*              | 3,64712    | ,000    | 8,0805                  | 33,7195     |
|           | GEA-S-D   | 19,6818*              | 2,97265    | ,000    | 9,2330                  | 30,1306     |
|           | GEA-S+cr  | -36,3889*             | 3,10862    | ,000    | -47,3156                | -25,4622    |
|           | GEA-S+D   | 5,0455                | 2,97265    | ,943    | -5,4033                 | 15,4942     |
|           | GEA+S-cr  | 20,1667*              | 3,45503    | ,000    | 8,0223                  | 32,3110     |
|           | GEA+S-D   | 20,6000*              | 3,03459    | ,000    | 9,9335                  | 31,2665     |
|           | GEA+S+cr  | 9,2727                | 2,97265    | ,143    | -1,1761                 | 19,7215     |
|           | GEA+S+D   | 16,3056*              | 3,10862    | ,000    | 5,3789                  | 27,2322     |
|           | IEA-S-cr  | 17,7043*              | 3,31101    | ,000    | 6,0662                  | 29,3424     |
| IEA-S-D   | 21,0833*  | 3,45503               | ,000       | 8,9390  | 33,2277                 |             |
| IEA-S+cr  | 10,5833   | 3,45503               | ,163       | -1,5610 | 22,7277                 |             |
| IEA+S-cr  | 20,1250*  | 3,91764               | ,000       | 6,3546  | 33,8954                 |             |
| IEA+S-D   | 20,3750*  | 3,91764               | ,000       | 6,6046  | 34,1454                 |             |
| IEA+S+cr  | 12,3000   | 3,64712               | ,074       | -,5195  | 25,1195                 |             |
| IEA+S+D   | 15,0625*  | 3,91764               | ,018       | 1,2921  | 28,8329                 |             |
| IEA+S-cr  | GEA-S-cr  | ,7750                 | 4,29156    | 1,000   | -14,3097                | 15,8597     |
|           | GEA-S-D   | -,4432                | 3,73532    | 1,000   | -13,5727                | 12,6864     |
|           | GEA-S+cr  | -56,5139*             | 3,84441    | ,000    | -70,0269                | -43,0009    |
|           | GEA-S+D   | -15,0795*             | 3,73532    | ,010    | -28,2091                | -1,9500     |
|           | GEA+S-cr  | ,0417                 | 4,12955    | 1,000   | -14,4736                | 14,5569     |
|           | GEA+S-D   | ,4750                 | 3,78480    | 1,000   | -12,8284                | 13,7784     |
|           | GEA+S+cr  | -10,8523              | 3,73532    | ,231    | -23,9818                | 2,2773      |
|           | GEA+S+D   | -3,8194               | 3,84441    | 1,000   | -17,3324                | 9,6935      |
|           | IEA-S-cr  | -2,4207               | 4,00983    | 1,000   | -16,5151                | 11,6737     |
|           | IEA-S-D   | ,9583                 | 4,12955    | 1,000   | -13,5569                | 15,4736     |
|           | IEA-S+cr  | -9,5417               | 4,12955    | ,617    | -24,0569                | 4,9736      |
|           | IEA-S+D   | -20,1250*             | 3,91764    | ,000    | -33,8954                | -6,3546     |
|           | IEA+S-D   | ,2500                 | 4,52370    | 1,000   | -15,6507                | 16,1507     |
|           | IEA+S+cr  | -7,8250               | 4,29156    | ,902    | -22,9097                | 7,2597      |
|           | IEA+S+D   | -5,0625               | 4,52370    | ,999    | -20,9632                | 10,8382     |

**Multiple Comparisons**

Dependent Variable: Cortisol

Tukey HSD

| (I) Grupo | (J) Grupo | Mean Difference (I-J) | Std. Error | Sig.  | 95% Confidence Interval |             |
|-----------|-----------|-----------------------|------------|-------|-------------------------|-------------|
|           |           |                       |            |       | Lower Bound             | Upper Bound |
| IEA+S-D   | GEA-S-cr  | ,5250                 | 4,29156    | 1,000 | -14,5597                | 15,6097     |
|           | GEA-S-D   | -,6932                | 3,73532    | 1,000 | -13,8227                | 12,4364     |
|           | GEA-S+cr  | -56,7639*             | 3,84441    | ,000  | -70,2769                | -43,2509    |
|           | GEA-S+D   | -15,3295*             | 3,73532    | ,008  | -28,4591                | -2,2000     |
|           | GEA+S-cr  | -,2083                | 4,12955    | 1,000 | -14,7236                | 14,3069     |
|           | GEA+S-D   | ,2250                 | 3,78480    | 1,000 | -13,0784                | 13,5284     |
|           | GEA+S+cr  | -11,1023              | 3,73532    | ,200  | -24,2318                | 2,0273      |
|           | GEA+S+D   | -4,0694               | 3,84441    | ,999  | -17,5824                | 9,4435      |
|           | IEA-S-cr  | -2,6707               | 4,00983    | 1,000 | -16,7651                | 11,4237     |
|           | IEA-S-D   | ,7083                 | 4,12955    | 1,000 | -13,8069                | 15,2236     |
|           | IEA-S+cr  | -9,7917               | 4,12955    | ,573  | -24,3069                | 4,7236      |
|           | IEA-S+D   | -20,3750*             | 3,91764    | ,000  | -34,1454                | -6,6046     |
|           | IEA+S-cr  | -,2500                | 4,52370    | 1,000 | -16,1507                | 15,6507     |
|           | IEA+S+cr  | -8,0750               | 4,29156    | ,878  | -23,1597                | 7,0097      |
|           | IEA+S+D   | -5,3125               | 4,52370    | ,998  | -21,2132                | 10,5882     |
| IEA+S+cr  | GEA-S-cr  | 8,6000                | 4,04612    | ,744  | -5,6220                 | 22,8220     |
|           | GEA-S-D   | 7,3818                | 3,45054    | ,735  | -4,7467                 | 19,5104     |
|           | GEA-S+cr  | -48,6889*             | 3,56834    | ,000  | -61,2315                | -36,1463    |
|           | GEA-S+D   | -7,2545               | 3,45054    | ,759  | -19,3831                | 4,8740      |
|           | GEA+S-cr  | 7,8667                | 3,87387    | ,802  | -5,7498                 | 21,4832     |
|           | GEA+S-D   | 8,3000                | 3,50404    | ,575  | -4,0166                 | 20,6166     |
|           | GEA+S+cr  | -3,0273               | 3,45054    | 1,000 | -15,1558                | 9,1013      |
|           | GEA+S+D   | 4,0056                | 3,56834    | ,999  | -8,5371                 | 16,5482     |
|           | IEA-S-cr  | 5,4043                | 3,74598    | ,986  | -7,7627                 | 18,5713     |
|           | IEA-S-D   | 8,7833                | 3,87387    | ,648  | -4,8332                 | 22,3998     |
|           | IEA-S+cr  | -1,7167               | 3,87387    | 1,000 | -15,3332                | 11,8998     |
|           | IEA-S+D   | -12,3000              | 3,64712    | ,074  | -25,1195                | ,5195       |
|           | IEA+S-cr  | 7,8250                | 4,29156    | ,902  | -7,2597                 | 22,9097     |
|           | IEA+S-D   | 8,0750                | 4,29156    | ,878  | -7,0097                 | 23,1597     |
|           | IEA+S+D   | 2,7625                | 4,29156    | 1,000 | -12,3222                | 17,8472     |
| IEA+S+D   | GEA-S-cr  | 5,8375                | 4,29156    | ,992  | -9,2472                 | 20,9222     |
|           | GEA-S-D   | 4,6193                | 3,73532    | ,997  | -8,5102                 | 17,7489     |
|           | GEA-S+cr  | -51,4514*             | 3,84441    | ,000  | -64,9644                | -37,9384    |
|           | GEA-S+D   | -10,0170              | 3,73532    | ,357  | -23,1466                | 3,1125      |
|           | GEA+S-cr  | 5,1042                | 4,12955    | ,997  | -9,4111                 | 19,6194     |
|           | GEA+S-D   | 5,5375                | 3,78480    | ,984  | -7,7659                 | 18,8409     |
|           | GEA+S+cr  | -5,7898               | 3,73532    | ,973  | -18,9193                | 7,3398      |
|           | GEA+S+D   | 1,2431                | 3,84441    | 1,000 | -12,2699                | 14,7560     |
|           | IEA-S-cr  | 2,6418                | 4,00983    | 1,000 | -11,4526                | 16,7362     |

### Multiple Comparisons

Dependent Variable: Cortisol

Tukey HSD

| (I) Grupo | (J) Grupo | Mean Difference (I-J) | Std. Error | Sig.  | 95% Confidence Interval |             |
|-----------|-----------|-----------------------|------------|-------|-------------------------|-------------|
|           |           |                       |            |       | Lower Bound             | Upper Bound |
|           | IEA-S-D   | 6,0208                | 4,12955    | ,985  | -8,4944                 | 20,5361     |
|           | IEA-S+cr  | -4,4792               | 4,12955    | ,999  | -18,9944                | 10,0361     |
|           | IEA-S+D   | -15,0625*             | 3,91764    | ,018  | -28,8329                | -1,2921     |
|           | IEA+S-cr  | 5,0625                | 4,52370    | ,999  | -10,8382                | 20,9632     |
|           | IEA+S-D   | 5,3125                | 4,52370    | ,998  | -10,5882                | 21,2132     |
|           | IEA+S+cr  | -2,7625               | 4,29156    | 1,000 | -17,8472                | 12,3222     |

Dependent Variable: Cortisol

Tukey HSD

### Homogeneous Subsets

#### Cortisol

Tukey HSD<sup>a,b,c</sup>

| Grupo    | N  | Subset  |         |         |         |
|----------|----|---------|---------|---------|---------|
|          |    | 1       | 2       | 3       | 4       |
| IEA-S-D  | 6  | 1,4167  |         |         |         |
| GEA-S-cr | 5  | 1,6000  |         |         |         |
| GEA+S-D  | 10 | 1,9000  |         |         |         |
| IEA+S-D  | 4  | 2,1250  |         |         |         |
| GEA+S-cr | 6  | 2,3333  |         |         |         |
| IEA+S-cr | 4  | 2,3750  |         |         |         |
| GEA-S-D  | 11 | 2,8182  |         |         |         |
| IEA-S-cr | 7  | 4,7957  |         |         |         |
| GEA+S+D  | 9  | 6,1944  | 6,1944  |         |         |
| IEA+S+D  | 4  | 7,4375  | 7,4375  |         |         |
| IEA+S+cr | 5  | 10,2000 | 10,2000 | 10,2000 |         |
| IEA-S+cr | 6  | 11,9167 | 11,9167 | 11,9167 |         |
| GEA+S+cr | 11 | 13,2273 | 13,2273 | 13,2273 |         |
| GEA-S+D  | 11 |         | 17,4545 | 17,4545 |         |
| IEA-S+D  | 8  |         |         | 22,5000 |         |
| GEA-S+cr | 9  |         |         |         | 58,8889 |
| Sig.     |    | ,092    | ,135    | ,064    | 1,000   |

Means for groups in homogeneous subsets are displayed.

Based on observed means.

The error term is Mean Square(Error) = 40,928.

a. Uses Harmonic Mean Sample Size = 6,367.

b. The group sizes are unequal. The harmonic mean of the group sizes is used. Type I error levels are not guaranteed.

c. Alpha = ,05.
