# Supplementary material for: Environmental and Pharmacological Manipulations Blunt the Stress Response of Zebrafish in a Similar Manner
Source: PubMed Central journal article supplement (PMC4924565; doi:10.1038/srep28986), 2016-06-28
Supplement: srep28986-s2.pdf [file srep28986-s2.pdf]

GET

FILE='C:\Users\Angelo\Dropbox\UFRGS HOME\ORIENTAÇÕES\Ana Giacominni-UPF\Enriquecimento\Dados para revista\FLU data.sav'.

DATASET NAME DataSet1 WINDOW=FRONT.

UNIANOVA Cortisol BY Housing Environment Stress Drug

/METHOD=SSTYPE(3)

/INTERCEPT=INCLUDE

/EMMEANS=TABLES(OVERALL)

/PRINT=ETASQ DESCRIPTIVE

/CRITERIA=ALPHA(.05)

/DESIGN=Housing Environment Stress Drug Housing\*Environment Housing\*Stress Housing\*Drug Environment\*Stress Environment\*Drug Stress\*Drug Housing\*Environment\*Stress Housing\*Environment\*Drug Housing\*Stress\*Drug Environment\*Stress\*Drug

Housing\*Environment\*Stress\*Drug.

## Univariate Analysis of Variance

[DataSet1] C:\Users\Angelo\Dropbox\UFRGS HOME\ORIENTAÇÕES\Ana Giacominni-UPF\Enriquecimento\Dados para revista\FLU data.sav

### Between-Subjects Factors

|             |         | Value Label | N  |
|-------------|---------|-------------|----|
| Housing     | GRUPO   | GRUPO       | 71 |
|             | ISOLADO | ISOLADO     | 46 |
| Environment | EA-     | EA-         | 61 |
|             | EA+     | EA+         | 56 |
| Stress      | S-      | S-          | 54 |
|             | S+      | S+          | 63 |
| Drug        | Flu0    | Flu0        | 53 |
|             | Flu50   | Flu50       | 64 |

### Descriptive Statistics

Dependent Variable: Cortisol

| Housing | Environment | Stress  | Drug     | Mean     | Std. Deviation | N  |
|---------|-------------|---------|----------|----------|----------------|----|
| GRUPO   | EA-         | S-      | Flu0     | 1,6000   | ,65192         | 5  |
|         |             |         | Flu50    | 3,2500   | 1,65412        | 10 |
|         |             |         | Total    | 2,7000   | 1,59015        | 15 |
|         |             | S+      | Flu0     | 58,8889  | 15,82280       | 9  |
|         |             |         | Flu50    | 16,9500  | 9,16348        | 10 |
|         |             |         | Total    | 36,8158  | 24,82170       | 19 |
|         | Total       | Flu0    | 38,4286  | 31,07550 | 14             |    |
|         |             | Flu50   | 10,1000  | 9,51121  | 20             |    |
|         |             | Total   | 21,7647  | 25,15505 | 34             |    |
|         | EA+         | S-      | Flu0     | 2,3333   | ,93095         | 6  |
|         |             |         | Flu50    | 2,7500   | 1,33853        | 10 |
|         |             |         | Total    | 2,5938   | 1,18629        | 16 |
|         |             | S+      | Flu0     | 13,2273  | 7,97923        | 11 |
|         |             |         | Flu50    | 11,2000  | 6,27694        | 10 |
|         |             |         | Total    | 12,2619  | 7,11621        | 21 |
|         | Total       | Flu0    | 9,3824   | 8,29821  | 17             |    |
|         |             | Flu50   | 6,9750   | 6,18886  | 20             |    |
|         |             | Total   | 8,0811   | 7,23179  | 37             |    |
| Total   | S-          | Flu0    | 2,0000   | ,86603   | 11             |    |
|         |             | Flu50   | 3,0000   | 1,48678  | 20             |    |
|         |             | Total   | 2,6452   | 1,37352  | 31             |    |
|         | S+          | Flu0    | 33,7750  | 26,11738 | 20             |    |
|         |             | Flu50   | 14,0750  | 8,19383  | 20             |    |
|         |             | Total   | 23,9250  | 21,55302 | 40             |    |
| Total   | Flu0        | 22,5000 | 25,90560 | 31       |                |    |
|         | Flu50       | 8,5375  | 8,07686  | 40       |                |    |
|         | Total       | 14,6338 | 19,30284 | 71       |                |    |
| ISOLADO | EA-         | S-      | Flu0     | 4,7957   | ,36395         | 7  |
|         |             |         | Flu50    | 1,9286   | ,67259         | 7  |
|         |             |         | Total    | 3,3621   | 1,57580        | 14 |
|         |             | S+      | Flu0     | 11,9167  | 2,31120        | 6  |
|         |             |         | Flu50    | 12,3571  | 5,34411        | 7  |
|         |             |         | Total    | 12,1538  | 4,06911        | 13 |
|         | Total       | Flu0    | 8,0823   | 3,99300  | 13             |    |
|         |             | Flu50   | 7,1429   | 6,53225  | 14             |    |
|         |             | Total   | 7,5952   | 5,37799  | 27             |    |
|         | EA+         | S-      | Flu0     | 2,3750   | ,85391         | 4  |
|         |             |         | Flu50    | 2,6000   | 1,29422        | 5  |
|         |             |         | Total    | 2,5000   | 1,06066        | 9  |

### Descriptive Statistics

Dependent Variable: Cortisol

| Housing | Environment | Stress | Drug    | Mean     | Std. Deviation | N       |    |
|---------|-------------|--------|---------|----------|----------------|---------|----|
| Total   | Total       | S+     | Flu0    | 10,2000  | 3,91472        | 5       |    |
|         |             |        | Flu50   | 12,4000  | 4,92950        | 5       |    |
|         |             |        | Total   | 11,3000  | 4,35380        | 10      |    |
|         |             | Total  | Flu0    | 6,7222   | 4,99444        | 9       |    |
|         |             |        |         | Flu50    | 7,5000         | 6,18241 | 10 |
|         |             |        |         | Total    | 7,1316         | 5,50969 | 19 |
|         | Total       | S-     | Flu0    | 3,9155   | 1,33784        | 11      |    |
|         |             |        | Flu50   | 2,2083   | ,98761         | 12      |    |
|         |             |        | Total   | 3,0248   | 1,43579        | 23      |    |
|         |             | S+     | Flu0    | 11,1364  | 3,09912        | 11      |    |
|         |             |        | Flu50   | 12,3750  | 4,94113        | 12      |    |
|         |             |        | Total   | 11,7826  | 4,11987        | 23      |    |
|         | Total       | Flu0   | 7,5259  | 4,36830  | 22             |         |    |
|         |             |        | Flu50   | 7,2917   | 6,25355        | 24      |    |
|         |             |        | Total   | 7,4037   | 5,37651        | 46      |    |
|         | Total       | EA-    | S-      | Flu0     | 3,4642         | 1,71309 | 12 |
|         |             |        |         | Flu50    | 2,7059         | 1,46904 | 17 |
|         |             |        |         | Total    | 3,0197         | 1,59077 | 29 |
| S+      |             |        | Flu0    | 40,1000  | 26,68948       | 15      |    |
|         |             |        | Flu50   | 15,0588  | 7,96061        | 17      |    |
|         |             |        | Total   | 26,7969  | 22,70671       | 32      |    |
| Total   |             | Flu0   | 23,8174 | 26,99913 | 27             |         |    |
|         |             |        | Flu50   | 8,8824   | 8,43070        | 34      |    |
|         |             |        | Total   | 15,4930  | 20,27113       | 61      |    |
| EA+     |             | S-     | Flu0    | 2,3500   | ,85147         | 10      |    |
|         |             |        | Flu50   | 2,7000   | 1,27895        | 15      |    |
|         |             |        | Total   | 2,5600   | 1,12101        | 25      |    |
|         |             | S+     | Flu0    | 12,2813  | 6,97369        | 16      |    |
|         |             |        | Flu50   | 11,6000  | 5,71089        | 15      |    |
|         |             |        | Total   | 11,9516  | 6,29729        | 31      |    |
| Total   |             | Flu0   | 8,4615  | 7,32929  | 26             |         |    |
|         |             |        | Flu50   | 7,1500   | 6,08439        | 30      |    |
|         |             |        | Total   | 7,7589   | 6,66128        | 56      |    |
| Total   | S-          | Flu0   | 2,9577  | 1,47321  | 22             |         |    |
|         |             | Flu50  | 2,7031  | 1,36109  | 32             |         |    |
|         |             | Total  | 2,8069  | 1,39981  | 54             |         |    |
|         | S+          | Flu0   | 25,7419 | 23,58915 | 31             |         |    |
|         |             | Flu50  | 13,4375 | 7,10719  | 32             |         |    |
|         |             | Total  | 19,4921 | 18,24707 | 63             |         |    |

### Descriptive Statistics

Dependent Variable: Cortisol

| Housing | Environment | Stress | Drug  | Mean    | Std. Deviation | N   |
|---------|-------------|--------|-------|---------|----------------|-----|
|         |             | Total  | Flu0  | 16,2843 | 21,22182       | 53  |
|         |             |        | Flu50 | 8,0703  | 7,41827        | 64  |
|         |             | Total  |       | 11,7912 | 15,76826       | 117 |

### Tests of Between-Subjects Effects

Dependent Variable: Cortisol

| Source                                | Type III Sum of Squares | df  | Mean Square | F       | Sig. |
|---------------------------------------|-------------------------|-----|-------------|---------|------|
| Corrected Model                       | 24676,365 <sup>a</sup>  | 15  | 1645,091    | 39,887  | ,000 |
| Intercept                             | 11799,947               | 1   | 11799,947   | 286,101 | ,000 |
| Housing                               | 1104,129                | 1   | 1104,129    | 26,771  | ,000 |
| Environment                           | 1235,047                | 1   | 1235,047    | 29,945  | ,000 |
| Stress                                | 6525,512                | 1   | 6525,512    | 158,217 | ,000 |
| Drug                                  | 727,325                 | 1   | 727,325     | 17,635  | ,000 |
| Housing * Environment                 | 944,751                 | 1   | 944,751     | 22,906  | ,000 |
| Housing * Stress                      | 1260,370                | 1   | 1260,370    | 30,559  | ,000 |
| Housing * Drug                        | 727,209                 | 1   | 727,209     | 17,632  | ,000 |
| Environment * Stress                  | 1101,696                | 1   | 1101,696    | 26,712  | ,000 |
| Environment * Drug                    | 784,969                 | 1   | 784,969     | 19,032  | ,000 |
| Stress * Drug                         | 687,917                 | 1   | 687,917     | 16,679  | ,000 |
| Housing * Environment * Stress        | 1108,155                | 1   | 1108,155    | 26,868  | ,000 |
| Housing * Environment * Drug          | 474,016                 | 1   | 474,016     | 11,493  | ,001 |
| Housing * Stress * Drug               | 1090,869                | 1   | 1090,869    | 26,449  | ,000 |
| Environment * Stress * Drug           | 656,616                 | 1   | 656,616     | 15,920  | ,000 |
| Housing * Environment * Stress * Drug | 747,473                 | 1   | 747,473     | 18,123  | ,000 |
| Error                                 | 4165,641                | 101 | 41,244      |         |      |
| Total                                 | 45108,787               | 117 |             |         |      |
| Corrected Total                       | 28842,006               | 116 |             |         |      |

### Tests of Between-Subjects Effects

Dependent Variable: Cortisol

| Source                                | Partial Eta Squared |
|---------------------------------------|---------------------|
| Corrected Model                       | ,856                |
| Intercept                             | ,739                |
| Housing                               | ,210                |
| Environment                           | ,229                |
| Stress                                | ,610                |
| Drug                                  | ,149                |
| Housing * Environment                 | ,185                |
| Housing * Stress                      | ,232                |
| Housing * Drug                        | ,149                |
| Environment * Stress                  | ,209                |
| Environment * Drug                    | ,159                |
| Stress * Drug                         | ,142                |
| Housing * Environment * Stress        | ,210                |
| Housing * Environment * Drug          | ,102                |
| Housing * Stress * Drug               | ,208                |
| Environment * Stress * Drug           | ,136                |
| Housing * Environment * Stress * Drug | ,152                |
| Error                                 |                     |
| Total                                 |                     |
| Corrected Total                       |                     |

a. R Squared = ,856 (Adjusted R Squared = ,834)

### Estimated Marginal Means

#### Grand Mean

Dependent Variable: Cortisol

| Mean   | Std. Error | 95% Confidence Interval |             |
|--------|------------|-------------------------|-------------|
|        |            | Lower Bound             | Upper Bound |
| 10,548 | ,624       | 9,311                   | 11,785      |

UNIANOVA Cortisol BY Grupo

/METHOD=SSTYPE(3)

/INTERCEPT=INCLUDE

/POSTHOC=Grupo(TUKEY)

/EMMEANS=TABLES(OVERALL)

/PRINT=ETASQ DESCRIPTIVE

/CRITERIA=ALPHA(.05)

/DESIGN=Grupo.

## Univariate Analysis of Variance

[DataSet1] C:\Users\Angelo\Dropbox\UFRGS HOME\ORIENTAÇÕES\Ana Giacominni-UPF\Enriquecimento\Dados para revista\FLU data.sav

### Between-Subjects Factors

|       |          | Value Label | N  |
|-------|----------|-------------|----|
| Grupo | GEA-S-cr | GEA-S-cr    | 5  |
|       | GEA-S-F  | GEA-S-F     | 10 |
|       | GEA-S+cr | GEA-S+cr    | 9  |
|       | GEA-S+F  | GEA-S+F     | 10 |
|       | GEA+S-cr | GEA+S-cr    | 6  |
|       | GEA+S-F  | GEA+S-F     | 10 |
|       | GEA+S+cr | GEA+S+cr    | 11 |
|       | GEA+S+F  | GEA+S+F     | 10 |
|       | IEA-S-cr | IEA-S-cr    | 7  |
|       | IEA-S-F  | IEA-S-F     | 7  |
|       | IEA-S+cr | IEA-S+cr    | 6  |
|       | IEA-S+F  | IEA-S+F     | 7  |
|       | IEA+S-cr | IEA+S-cr    | 4  |
|       | IEA+S-F  | IEA+S-F     | 5  |
|       | IEA+S+cr | IEA+S+cr    | 5  |
|       | IEA+S+F  | IEA+S+F     | 5  |

### Descriptive Statistics

Dependent Variable: Cortisol

| Grupo    | Mean    | Std. Deviation | N   |
|----------|---------|----------------|-----|
| GEA-S-cr | 1,6000  | ,65192         | 5   |
| GEA-S-F  | 3,2500  | 1,65412        | 10  |
| GEA-S+cr | 58,8889 | 15,82280       | 9   |
| GEA-S+F  | 16,9500 | 9,16348        | 10  |
| GEA+S-cr | 2,3333  | ,93095         | 6   |
| GEA+S-F  | 2,7500  | 1,33853        | 10  |
| GEA+S+cr | 13,2273 | 7,97923        | 11  |
| GEA+S+F  | 11,2000 | 6,27694        | 10  |
| IEA-S-cr | 4,7957  | ,36395         | 7   |
| IEA-S-F  | 1,9286  | ,67259         | 7   |
| IEA-S+cr | 11,9167 | 2,31120        | 6   |
| IEA-S+F  | 12,3571 | 5,34411        | 7   |
| IEA+S-cr | 2,3750  | ,85391         | 4   |
| IEA+S-F  | 2,6000  | 1,29422        | 5   |
| IEA+S+cr | 10,2000 | 3,91472        | 5   |
| IEA+S+F  | 12,4000 | 4,92950        | 5   |
| Total    | 11,7912 | 15,76826       | 117 |

### Tests of Between-Subjects Effects

Dependent Variable: Cortisol

| Source          | Type III Sum of Squares | df  | Mean Square | F       | Sig. | Partial Eta Squared |
|-----------------|-------------------------|-----|-------------|---------|------|---------------------|
| Corrected Model | 24676,365 <sup>a</sup>  | 15  | 1645,091    | 39,887  | ,000 | ,856                |
| Intercept       | 11799,947               | 1   | 11799,947   | 286,101 | ,000 | ,739                |
| Grupo           | 24676,365               | 15  | 1645,091    | 39,887  | ,000 | ,856                |
| Error           | 4165,641                | 101 | 41,244      |         |      |                     |
| Total           | 45108,787               | 117 |             |         |      |                     |
| Corrected Total | 28842,006               | 116 |             |         |      |                     |

a. R Squared = ,856 (Adjusted R Squared = ,834)

### Estimated Marginal Means

#### Grand Mean

Dependent Variable: Cortisol

| Mean   | Std. Error | 95% Confidence Interval |             |
|--------|------------|-------------------------|-------------|
|        |            | Lower Bound             | Upper Bound |
| 10,548 | ,624       | 9,311                   | 11,785      |

### Post Hoc Tests

#### Grupo

**Multiple Comparisons**

Dependent Variable: Cortisol

Tukey HSD

| (I) Grupo | (J) Grupo | Mean Difference (I-J) | Std. Error | Sig.  | 95% Confidence Interval |             |
|-----------|-----------|-----------------------|------------|-------|-------------------------|-------------|
|           |           |                       |            |       | Lower Bound             | Upper Bound |
| GEA-S-cr  | GEA-S-F   | -1,6500               | 3,51755    | 1,000 | -14,0110                | 10,7110     |
|           | GEA-S+cr  | -57,2889*             | 3,58210    | ,000  | -69,8767                | -44,7011    |
|           | GEA-S+F   | -15,3500*             | 3,51755    | ,003  | -27,7110                | -2,9890     |
|           | GEA+S-cr  | -,7333                | 3,88880    | 1,000 | -14,3989                | 12,9322     |
|           | GEA+S-F   | -1,1500               | 3,51755    | 1,000 | -13,5110                | 11,2110     |
|           | GEA+S+cr  | -11,6273              | 3,46385    | ,078  | -23,7995                | ,5450       |
|           | GEA+S+F   | -9,6000               | 3,51755    | ,328  | -21,9610                | 2,7610      |
|           | IEA-S-cr  | -3,1957               | 3,76042    | 1,000 | -16,4101                | 10,0187     |
|           | IEA-S-F   | -,3286                | 3,76042    | 1,000 | -13,5430                | 12,8859     |
|           | IEA-S+cr  | -10,3167              | 3,88880    | ,375  | -23,9822                | 3,3489      |
|           | IEA-S+F   | -10,7571              | 3,76042    | ,254  | -23,9716                | 2,4573      |
|           | IEA+S-cr  | -,7750                | 4,30811    | 1,000 | -15,9140                | 14,3640     |
|           | IEA+S-F   | -1,0000               | 4,06172    | 1,000 | -15,2732                | 13,2732     |
|           | IEA+S+cr  | -8,6000               | 4,06172    | ,750  | -22,8732                | 5,6732      |
|           | IEA+S+F   | -10,8000              | 4,06172    | ,372  | -25,0732                | 3,4732      |
| GEA-S-F   | GEA-S-cr  | 1,6500                | 3,51755    | 1,000 | -10,7110                | 14,0110     |
|           | GEA-S+cr  | -55,6389*             | 2,95077    | ,000  | -66,0081                | -45,2696    |
|           | GEA-S+F   | -13,7000*             | 2,87207    | ,001  | -23,7927                | -3,6073     |
|           | GEA+S-cr  | ,9167                 | 3,31638    | 1,000 | -10,7374                | 12,5707     |
|           | GEA+S-F   | ,5000                 | 2,87207    | 1,000 | -9,5927                 | 10,5927     |
|           | GEA+S+cr  | -9,9773*              | 2,80604    | ,044  | -19,8379                | -,1166      |
|           | GEA+S+F   | -7,9500               | 2,87207    | ,305  | -18,0427                | 2,1427      |
|           | IEA-S-cr  | -1,5457               | 3,16487    | 1,000 | -12,6673                | 9,5759      |
|           | IEA-S-F   | 1,3214                | 3,16487    | 1,000 | -9,8002                 | 12,4430     |
|           | IEA-S+cr  | -8,6667               | 3,31638    | ,402  | -20,3207                | 2,9874      |
|           | IEA-S+F   | -9,1071               | 3,16487    | ,245  | -20,2287                | 2,0145      |
|           | IEA+S-cr  | ,8750                 | 3,79939    | 1,000 | -12,4764                | 14,2264     |
|           | IEA+S-F   | ,6500                 | 3,51755    | 1,000 | -11,7110                | 13,0110     |
|           | IEA+S+cr  | -6,9500               | 3,51755    | ,832  | -19,3110                | 5,4110      |
|           | IEA+S+F   | -9,1500               | 3,51755    | ,410  | -21,5110                | 3,2110      |
| GEA-S+cr  | GEA-S-cr  | 57,2889*              | 3,58210    | ,000  | 44,7011                 | 69,8767     |
|           | GEA-S-F   | 55,6389*              | 2,95077    | ,000  | 45,2696                 | 66,0081     |
|           | GEA-S+F   | 41,9389*              | 2,95077    | ,000  | 31,5696                 | 52,3081     |
|           | GEA+S-cr  | 56,5556*              | 3,38477    | ,000  | 44,6612                 | 68,4499     |
|           | GEA+S-F   | 56,1389*              | 2,95077    | ,000  | 45,7696                 | 66,5081     |
|           | GEA+S+cr  | 45,6616*              | 2,88654    | ,000  | 35,5181                 | 55,8052     |
|           | GEA+S+F   | 47,6889*              | 2,95077    | ,000  | 37,3196                 | 58,0581     |
|           | IEA-S-cr  | 54,0932*              | 3,23646    | ,000  | 42,7200                 | 65,4663     |
|           | IEA-S-F   | 56,9603*              | 3,23646    | ,000  | 45,5871                 | 68,3335     |



**Multiple Comparisons**

Dependent Variable: Cortisol

Tukey HSD

| (I) Grupo | (J) Grupo | Mean Difference (I-J) | Std. Error | Sig.     | 95% Confidence Interval |             |
|-----------|-----------|-----------------------|------------|----------|-------------------------|-------------|
|           |           |                       |            |          | Lower Bound             | Upper Bound |
| GEA+S+F   | IEA-S+cr  | 46,9722*              | 3,38477    | ,000     | 35,0779                 | 58,8666     |
|           | IEA-S+F   | 46,5317*              | 3,23646    | ,000     | 35,1586                 | 57,9049     |
|           | IEA+S-cr  | 56,5139*              | 3,85923    | ,000     | 42,9522                 | 70,0755     |
|           | IEA+S-F   | 56,2889*              | 3,58210    | ,000     | 43,7011                 | 68,8767     |
|           | IEA+S+cr  | 48,6889*              | 3,58210    | ,000     | 36,1011                 | 61,2767     |
|           | IEA+S+F   | 46,4889*              | 3,58210    | ,000     | 33,9011                 | 59,0767     |
|           | GEA-S-cr  | 15,3500*              | 3,51755    | ,003     | 2,9890                  | 27,7110     |
|           | GEA-S-F   | 13,7000*              | 2,87207    | ,001     | 3,6073                  | 23,7927     |
|           | GEA-S+cr  | -41,9389*             | 2,95077    | ,000     | -52,3081                | -31,5696    |
|           | GEA+S-cr  | 14,6167*              | 3,31638    | ,003     | 2,9626                  | 26,2707     |
|           | GEA+S-F   | 14,2000*              | 2,87207    | ,000     | 4,1073                  | 24,2927     |
|           | GEA+S+cr  | 3,7227                | 2,80604    | ,994     | -6,1379                 | 13,5834     |
|           | GEA+S+F   | 5,7500                | 2,87207    | ,818     | -4,3427                 | 15,8427     |
|           | IEA-S-cr  | 12,1543*              | 3,16487    | ,018     | 1,0327                  | 23,2759     |
|           | IEA-S-F   | 15,0214*              | 3,16487    | ,001     | 3,8998                  | 26,1430     |
|           | IEA-S+cr  | 5,0333                | 3,31638    | ,978     | -6,6207                 | 16,6874     |
|           | IEA-S+F   | 4,5929                | 3,16487    | ,985     | -6,5287                 | 15,7145     |
|           | IEA+S-cr  | 14,5750*              | 3,79939    | ,019     | 1,2236                  | 27,9264     |
|           | IEA+S-F   | 14,3500*              | 3,51755    | ,008     | 1,9890                  | 26,7110     |
|           | IEA+S+cr  | 6,7500                | 3,51755    | ,861     | -5,6110                 | 19,1110     |
| IEA+S+F   | 4,5500    | 3,51755               | ,995       | -7,8110  | 16,9110                 |             |
| GEA+S-cr  | GEA-S-cr  | ,7333                 | 3,88880    | 1,000    | -12,9322                | 14,3989     |
|           | GEA-S-F   | -,9167                | 3,31638    | 1,000    | -12,5707                | 10,7374     |
|           | GEA-S+cr  | -56,5556*             | 3,38477    | ,000     | -68,4499                | -44,6612    |
|           | GEA-S+F   | -14,6167*             | 3,31638    | ,003     | -26,2707                | -2,9626     |
|           | GEA+S-F   | -,4167                | 3,31638    | 1,000    | -12,0707                | 11,2374     |
|           | GEA+S+cr  | -10,8939              | 3,25936    | ,081     | -22,3476                | ,5597       |
|           | GEA+S+F   | -8,8667               | 3,31638    | ,362     | -20,5207                | 2,7874      |
|           | IEA-S-cr  | -2,4624               | 3,57295    | 1,000    | -15,0180                | 10,0933     |
|           | IEA-S-F   | ,4048                 | 3,57295    | 1,000    | -12,1509                | 12,9604     |
|           | IEA-S+cr  | -9,5833               | 3,70783    | ,421     | -22,6129                | 3,4463      |
|           | IEA-S+F   | -10,0238              | 3,57295    | ,283     | -22,5795                | 2,5318      |
|           | IEA+S-cr  | -,0417                | 4,14548    | 1,000    | -14,6092                | 14,5259     |
|           | IEA+S-F   | -,2667                | 3,88880    | 1,000    | -13,9322                | 13,3989     |
|           | IEA+S+cr  | -7,8667               | 3,88880    | ,807     | -21,5322                | 5,7989      |
| IEA+S+F   | -10,0667  | 3,88880               | ,418       | -23,7322 | 3,5989                  |             |
| GEA+S-F   | GEA-S-cr  | 1,1500                | 3,51755    | 1,000    | -11,2110                | 13,5110     |
|           | GEA-S-F   | -,5000                | 2,87207    | 1,000    | -10,5927                | 9,5927      |
|           | GEA-S+cr  | -56,1389*             | 2,95077    | ,000     | -66,5081                | -45,7696    |

**Multiple Comparisons**

Dependent Variable: Cortisol

Tukey HSD

| (I) Grupo | (J) Grupo | Mean Difference (I-J) | Std. Error | Sig.     | 95% Confidence Interval |             |
|-----------|-----------|-----------------------|------------|----------|-------------------------|-------------|
|           |           |                       |            |          | Lower Bound             | Upper Bound |
| GEA+S+cr  | GEA-S+F   | -14,2000*             | 2,87207    | ,000     | -24,2927                | -4,1073     |
|           | GEA+S-cr  | ,4167                 | 3,31638    | 1,000    | -11,2374                | 12,0707     |
|           | GEA+S+cr  | -10,4773*             | 2,80604    | ,026     | -20,3379                | -,6166      |
|           | GEA+S+F   | -8,4500               | 2,87207    | ,214     | -18,5427                | 1,6427      |
|           | IEA-S-cr  | -2,0457               | 3,16487    | 1,000    | -13,1673                | 9,0759      |
|           | IEA-S-F   | ,8214                 | 3,16487    | 1,000    | -10,3002                | 11,9430     |
|           | IEA-S+cr  | -9,1667               | 3,31638    | ,307     | -20,8207                | 2,4874      |
|           | IEA-S+F   | -9,6071               | 3,16487    | ,173     | -20,7287                | 1,5145      |
|           | IEA+S-cr  | ,3750                 | 3,79939    | 1,000    | -12,9764                | 13,7264     |
|           | IEA+S-F   | ,1500                 | 3,51755    | 1,000    | -12,2110                | 12,5110     |
|           | IEA+S+cr  | -7,4500               | 3,51755    | ,749     | -19,8110                | 4,9110      |
|           | IEA+S+F   | -9,6500               | 3,51755    | ,319     | -22,0110                | 2,7110      |
|           | GEA-S-cr  | 11,6273               | 3,46385    | ,078     | -,5450                  | 23,7995     |
|           | GEA-S-F   | 9,9773*               | 2,80604    | ,044     | ,1166                   | 19,8379     |
|           | GEA-S+cr  | -45,6616*             | 2,88654    | ,000     | -55,8052                | -35,5181    |
|           | GEA-S+F   | -3,7227               | 2,80604    | ,994     | -13,5834                | 6,1379      |
|           | GEA+S-cr  | 10,8939               | 3,25936    | ,081     | -,5597                  | 22,3476     |
|           | GEA+S-F   | 10,4773*              | 2,80604    | ,026     | ,6166                   | 20,3379     |
|           | GEA+S+F   | 2,0273                | 2,80604    | 1,000    | -7,8334                 | 11,8879     |
|           | IEA-S-cr  | 8,4316                | 3,10507    | ,336     | -2,4799                 | 19,3430     |
| IEA-S-F   | 11,2987*  | 3,10507               | ,035       | ,3872    | 22,2102                 |             |
| IEA-S+cr  | 1,3106    | 3,25936               | 1,000      | -10,1431 | 12,7643                 |             |
| IEA-S+F   | ,8701     | 3,10507               | 1,000      | -10,0413 | 11,7816                 |             |
| IEA+S-cr  | 10,8523   | 3,74973               | ,237       | -2,3246  | 24,0291                 |             |
| IEA+S-F   | 10,6273   | 3,46385               | ,161       | -1,5450  | 22,7995                 |             |
| IEA+S+cr  | 3,0273    | 3,46385               | 1,000      | -9,1450  | 15,1995                 |             |
| IEA+S+F   | ,8273     | 3,46385               | 1,000      | -11,3450 | 12,9995                 |             |
| GEA+S+F   | GEA-S-cr  | 9,6000                | 3,51755    | ,328     | -2,7610                 | 21,9610     |
|           | GEA-S-F   | 7,9500                | 2,87207    | ,305     | -2,1427                 | 18,0427     |
|           | GEA-S+cr  | -47,6889*             | 2,95077    | ,000     | -58,0581                | -37,3196    |
|           | GEA-S+F   | -5,7500               | 2,87207    | ,818     | -15,8427                | 4,3427      |
|           | GEA+S-cr  | 8,8667                | 3,31638    | ,362     | -2,7874                 | 20,5207     |
|           | GEA+S-F   | 8,4500                | 2,87207    | ,214     | -1,6427                 | 18,5427     |
|           | GEA+S+cr  | -2,0273               | 2,80604    | 1,000    | -11,8879                | 7,8334      |
|           | IEA-S-cr  | 6,4043                | 3,16487    | ,806     | -4,7173                 | 17,5259     |
|           | IEA-S-F   | 9,2714                | 3,16487    | ,219     | -1,8502                 | 20,3930     |
|           | IEA-S+cr  | -,7167                | 3,31638    | 1,000    | -12,3707                | 10,9374     |
|           | IEA-S+F   | -1,1571               | 3,16487    | 1,000    | -12,2787                | 9,9645      |
|           | IEA+S-cr  | 8,8250                | 3,79939    | ,608     | -4,5264                 | 22,1764     |

**Multiple Comparisons**

Dependent Variable: Cortisol

Tukey HSD

| (I) Grupo | (J) Grupo | Mean Difference (I-J) | Std. Error | Sig.  | 95% Confidence Interval |             |
|-----------|-----------|-----------------------|------------|-------|-------------------------|-------------|
|           |           |                       |            |       | Lower Bound             | Upper Bound |
| IEA-S-cr  | IEA+S-F   | 8,6000                | 3,51755    | ,520  | -3,7610                 | 20,9610     |
|           | IEA+S+cr  | 1,0000                | 3,51755    | 1,000 | -11,3610                | 13,3610     |
|           | IEA+S+F   | -1,2000               | 3,51755    | 1,000 | -13,5610                | 11,1610     |
|           | GEA-S-cr  | 3,1957                | 3,76042    | 1,000 | -10,0187                | 16,4101     |
|           | GEA-S-F   | 1,5457                | 3,16487    | 1,000 | -9,5759                 | 12,6673     |
|           | GEA-S+cr  | -54,0932*             | 3,23646    | ,000  | -65,4663                | -42,7200    |
|           | GEA-S+F   | -12,1543*             | 3,16487    | ,018  | -23,2759                | -1,0327     |
|           | GEA+S-cr  | 2,4624                | 3,57295    | 1,000 | -10,0933                | 15,0180     |
|           | GEA+S-F   | 2,0457                | 3,16487    | 1,000 | -9,0759                 | 13,1673     |
|           | GEA+S+cr  | -8,4316               | 3,10507    | ,336  | -19,3430                | 2,4799      |
|           | GEA+S+F   | -6,4043               | 3,16487    | ,806  | -17,5259                | 4,7173      |
|           | IEA-S-F   | 2,8671                | 3,43278    | 1,000 | -9,1959                 | 14,9302     |
|           | IEA-S+cr  | -7,1210               | 3,57295    | ,823  | -19,6766                | 5,4347      |
|           | IEA-S+F   | -7,5614               | 3,43278    | ,693  | -19,6245                | 4,5016      |
|           | IEA+S-cr  | 2,4207                | 4,02529    | 1,000 | -11,7245                | 16,5659     |
|           | IEA+S-F   | 2,1957                | 3,76042    | 1,000 | -11,0187                | 15,4101     |
|           | IEA+S+cr  | -5,4043               | 3,76042    | ,987  | -18,6187                | 7,8101      |
|           | IEA+S+F   | -7,6043               | 3,76042    | ,807  | -20,8187                | 5,6101      |
| IEA-S-F   | GEA-S-cr  | ,3286                 | 3,76042    | 1,000 | -12,8859                | 13,5430     |
|           | GEA-S-F   | -1,3214               | 3,16487    | 1,000 | -12,4430                | 9,8002      |
|           | GEA-S+cr  | -56,9603*             | 3,23646    | ,000  | -68,3335                | -45,5871    |
|           | GEA-S+F   | -15,0214*             | 3,16487    | ,001  | -26,1430                | -3,8998     |
|           | GEA+S-cr  | -,4048                | 3,57295    | 1,000 | -12,9604                | 12,1509     |
|           | GEA+S-F   | -,8214                | 3,16487    | 1,000 | -11,9430                | 10,3002     |
|           | GEA+S+cr  | -11,2987*             | 3,10507    | ,035  | -22,2102                | -,3872      |
|           | GEA+S+F   | -9,2714               | 3,16487    | ,219  | -20,3930                | 1,8502      |
|           | IEA-S-cr  | -2,8671               | 3,43278    | 1,000 | -14,9302                | 9,1959      |
|           | IEA-S+cr  | -9,9881               | 3,57295    | ,289  | -22,5437                | 2,5675      |
|           | IEA-S+F   | -10,4286              | 3,43278    | ,172  | -22,4916                | 1,6345      |
|           | IEA+S-cr  | -,4464                | 4,02529    | 1,000 | -14,5916                | 13,6988     |
|           | IEA+S-F   | -,6714                | 3,76042    | 1,000 | -13,8859                | 12,5430     |
|           | IEA+S+cr  | -8,2714               | 3,76042    | ,695  | -21,4859                | 4,9430      |
|           | IEA+S+F   | -10,4714              | 3,76042    | ,295  | -23,6859                | 2,7430      |
| IEA-S+cr  | GEA-S-cr  | 10,3167               | 3,88880    | ,375  | -3,3489                 | 23,9822     |
|           | GEA-S-F   | 8,6667                | 3,31638    | ,402  | -2,9874                 | 20,3207     |
|           | GEA-S+cr  | -46,9722*             | 3,38477    | ,000  | -58,8666                | -35,0779    |
|           | GEA-S+F   | -5,0333               | 3,31638    | ,978  | -16,6874                | 6,6207      |
|           | GEA+S-cr  | 9,5833                | 3,70783    | ,421  | -3,4463                 | 22,6129     |
|           | GEA+S-F   | 9,1667                | 3,31638    | ,307  | -2,4874                 | 20,8207     |

**Multiple Comparisons**

Dependent Variable: Cortisol

Tukey HSD

| (I) Grupo | (J) Grupo | Mean Difference (I-J) | Std. Error | Sig.     | 95% Confidence Interval |             |
|-----------|-----------|-----------------------|------------|----------|-------------------------|-------------|
|           |           |                       |            |          | Lower Bound             | Upper Bound |
| IEA-S+F   | GEA+S+cr  | -1,3106               | 3,25936    | 1,000    | -12,7643                | 10,1431     |
|           | GEA+S+F   | ,7167                 | 3,31638    | 1,000    | -10,9374                | 12,3707     |
|           | IEA-S-cr  | 7,1210                | 3,57295    | ,823     | -5,4347                 | 19,6766     |
|           | IEA-S-F   | 9,9881                | 3,57295    | ,289     | -2,5675                 | 22,5437     |
|           | IEA-S+F   | -,4405                | 3,57295    | 1,000    | -12,9961                | 12,1152     |
|           | IEA+S-cr  | 9,5417                | 4,14548    | ,623     | -5,0259                 | 24,1092     |
|           | IEA+S-F   | 9,3167                | 3,88880    | ,555     | -4,3489                 | 22,9822     |
|           | IEA+S+cr  | 1,7167                | 3,88880    | 1,000    | -11,9489                | 15,3822     |
|           | IEA+S+F   | -,4833                | 3,88880    | 1,000    | -14,1489                | 13,1822     |
|           | GEA-S-cr  | 10,7571               | 3,76042    | ,254     | -2,4573                 | 23,9716     |
|           | GEA-S-F   | 9,1071                | 3,16487    | ,245     | -2,0145                 | 20,2287     |
|           | GEA-S+cr  | -46,5317*             | 3,23646    | ,000     | -57,9049                | -35,1586    |
|           | GEA-S+F   | -4,5929               | 3,16487    | ,985     | -15,7145                | 6,5287      |
|           | GEA+S-cr  | 10,0238               | 3,57295    | ,283     | -2,5318                 | 22,5795     |
|           | GEA+S-F   | 9,6071                | 3,16487    | ,173     | -1,5145                 | 20,7287     |
|           | GEA+S+cr  | -,8701                | 3,10507    | 1,000    | -11,7816                | 10,0413     |
|           | GEA+S+F   | 1,1571                | 3,16487    | 1,000    | -9,9645                 | 12,2787     |
|           | IEA-S-cr  | 7,5614                | 3,43278    | ,693     | -4,5016                 | 19,6245     |
| IEA-S-F   | 10,4286   | 3,43278               | ,172       | -1,6345  | 22,4916                 |             |
| IEA-S+cr  | ,4405     | 3,57295               | 1,000      | -12,1152 | 12,9961                 |             |
| IEA+S-cr  | 9,9821    | 4,02529               | ,494       | -4,1631  | 24,1274                 |             |
| IEA+S-F   | 9,7571    | 3,76042               | ,414       | -3,4573  | 22,9716                 |             |
| IEA+S+cr  | 2,1571    | 3,76042               | 1,000      | -11,0573 | 15,3716                 |             |
| IEA+S+F   | -,0429    | 3,76042               | 1,000      | -13,2573 | 13,1716                 |             |
| IEA+S-cr  | GEA-S-cr  | ,7750                 | 4,30811    | 1,000    | -14,3640                | 15,9140     |
|           | GEA-S-F   | -,8750                | 3,79939    | 1,000    | -14,2264                | 12,4764     |
|           | GEA-S+cr  | -56,5139*             | 3,85923    | ,000     | -70,0755                | -42,9522    |
|           | GEA-S+F   | -14,5750*             | 3,79939    | ,019     | -27,9264                | -1,2236     |
|           | GEA+S-cr  | ,0417                 | 4,14548    | 1,000    | -14,5259                | 14,6092     |
|           | GEA+S-F   | -,3750                | 3,79939    | 1,000    | -13,7264                | 12,9764     |
|           | GEA+S+cr  | -10,8523              | 3,74973    | ,237     | -24,0291                | 2,3246      |
|           | GEA+S+F   | -8,8250               | 3,79939    | ,608     | -22,1764                | 4,5264      |
|           | IEA-S-cr  | -2,4207               | 4,02529    | 1,000    | -16,5659                | 11,7245     |
|           | IEA-S-F   | ,4464                 | 4,02529    | 1,000    | -13,6988                | 14,5916     |
|           | IEA-S+cr  | -9,5417               | 4,14548    | ,623     | -24,1092                | 5,0259      |
|           | IEA-S+F   | -9,9821               | 4,02529    | ,494     | -24,1274                | 4,1631      |
|           | IEA+S-F   | -,2250                | 4,30811    | 1,000    | -15,3640                | 14,9140     |
|           | IEA+S+cr  | -7,8250               | 4,30811    | ,905     | -22,9640                | 7,3140      |
|           | IEA+S+F   | -10,0250              | 4,30811    | ,605     | -25,1640                | 5,1140      |

**Multiple Comparisons**

Dependent Variable: Cortisol

Tukey HSD

| (I) Grupo | (J) Grupo | Mean Difference (I-J) | Std. Error | Sig.  | 95% Confidence Interval |             |
|-----------|-----------|-----------------------|------------|-------|-------------------------|-------------|
|           |           |                       |            |       | Lower Bound             | Upper Bound |
| IEA+S-F   | GEA-S-cr  | 1,0000                | 4,06172    | 1,000 | -13,2732                | 15,2732     |
|           | GEA-S-F   | -,6500                | 3,51755    | 1,000 | -13,0110                | 11,7110     |
|           | GEA-S+cr  | -56,2889*             | 3,58210    | ,000  | -68,8767                | -43,7011    |
|           | GEA-S+F   | -14,3500*             | 3,51755    | ,008  | -26,7110                | -1,9890     |
|           | GEA+S-cr  | ,2667                 | 3,88880    | 1,000 | -13,3989                | 13,9322     |
|           | GEA+S-F   | -,1500                | 3,51755    | 1,000 | -12,5110                | 12,2110     |
|           | GEA+S+cr  | -10,6273              | 3,46385    | ,161  | -22,7995                | 1,5450      |
|           | GEA+S+F   | -8,6000               | 3,51755    | ,520  | -20,9610                | 3,7610      |
|           | IEA-S-cr  | -2,1957               | 3,76042    | 1,000 | -15,4101                | 11,0187     |
|           | IEA-S-F   | ,6714                 | 3,76042    | 1,000 | -12,5430                | 13,8859     |
|           | IEA-S+cr  | -9,3167               | 3,88880    | ,555  | -22,9822                | 4,3489      |
|           | IEA-S+F   | -9,7571               | 3,76042    | ,414  | -22,9716                | 3,4573      |
|           | IEA+S-cr  | ,2250                 | 4,30811    | 1,000 | -14,9140                | 15,3640     |
|           | IEA+S+cr  | -7,6000               | 4,06172    | ,883  | -21,8732                | 6,6732      |
|           | IEA+S+F   | -9,8000               | 4,06172    | ,543  | -24,0732                | 4,4732      |
| IEA+S+cr  | GEA-S-cr  | 8,6000                | 4,06172    | ,750  | -5,6732                 | 22,8732     |
|           | GEA-S-F   | 6,9500                | 3,51755    | ,832  | -5,4110                 | 19,3110     |
|           | GEA-S+cr  | -48,6889*             | 3,58210    | ,000  | -61,2767                | -36,1011    |
|           | GEA-S+F   | -6,7500               | 3,51755    | ,861  | -19,1110                | 5,6110      |
|           | GEA+S-cr  | 7,8667                | 3,88880    | ,807  | -5,7989                 | 21,5322     |
|           | GEA+S-F   | 7,4500                | 3,51755    | ,749  | -4,9110                 | 19,8110     |
|           | GEA+S+cr  | -3,0273               | 3,46385    | 1,000 | -15,1995                | 9,1450      |
|           | GEA+S+F   | -1,0000               | 3,51755    | 1,000 | -13,3610                | 11,3610     |
|           | IEA-S-cr  | 5,4043                | 3,76042    | ,987  | -7,8101                 | 18,6187     |
|           | IEA-S-F   | 8,2714                | 3,76042    | ,695  | -4,9430                 | 21,4859     |
|           | IEA-S+cr  | -1,7167               | 3,88880    | 1,000 | -15,3822                | 11,9489     |
|           | IEA-S+F   | -2,1571               | 3,76042    | 1,000 | -15,3716                | 11,0573     |
|           | IEA+S-cr  | 7,8250                | 4,30811    | ,905  | -7,3140                 | 22,9640     |
|           | IEA+S-F   | 7,6000                | 4,06172    | ,883  | -6,6732                 | 21,8732     |
|           | IEA+S+F   | -2,2000               | 4,06172    | 1,000 | -16,4732                | 12,0732     |
| IEA+S+F   | GEA-S-cr  | 10,8000               | 4,06172    | ,372  | -3,4732                 | 25,0732     |
|           | GEA-S-F   | 9,1500                | 3,51755    | ,410  | -3,2110                 | 21,5110     |
|           | GEA-S+cr  | -46,4889*             | 3,58210    | ,000  | -59,0767                | -33,9011    |
|           | GEA-S+F   | -4,5500               | 3,51755    | ,995  | -16,9110                | 7,8110      |
|           | GEA+S-cr  | 10,0667               | 3,88880    | ,418  | -3,5989                 | 23,7322     |
|           | GEA+S-F   | 9,6500                | 3,51755    | ,319  | -2,7110                 | 22,0110     |
|           | GEA+S+cr  | -,8273                | 3,46385    | 1,000 | -12,9995                | 11,3450     |
|           | GEA+S+F   | 1,2000                | 3,51755    | 1,000 | -11,1610                | 13,5610     |
|           | IEA-S-cr  | 7,6043                | 3,76042    | ,807  | -5,6101                 | 20,8187     |

### Multiple Comparisons

Dependent Variable: Cortisol

Tukey HSD

| (I) Grupo | (J) Grupo | Mean Difference (I-J) | Std. Error | Sig.  | 95% Confidence Interval |             |
|-----------|-----------|-----------------------|------------|-------|-------------------------|-------------|
|           |           |                       |            |       | Lower Bound             | Upper Bound |
|           | IEA-S-F   | 10,4714               | 3,76042    | ,295  | -2,7430                 | 23,6859     |
|           | IEA-S+cr  | ,4833                 | 3,88880    | 1,000 | -13,1822                | 14,1489     |
|           | IEA-S+F   | ,0429                 | 3,76042    | 1,000 | -13,1716                | 13,2573     |
|           | IEA+S-cr  | 10,0250               | 4,30811    | ,605  | -5,1140                 | 25,1640     |
|           | IEA+S-F   | 9,8000                | 4,06172    | ,543  | -4,4732                 | 24,0732     |
|           | IEA+S+cr  | 2,2000                | 4,06172    | 1,000 | -12,0732                | 16,4732     |

Dependent Variable: Cortisol

Tukey HSD

### Homogeneous Subsets

Cortisol

Tukey HSD<sup>a,b,c</sup>

| Grupo    | N  | Subset  |         |         |
|----------|----|---------|---------|---------|
|          |    | 1       | 2       | 3       |
| GEA-S-cr | 5  | 1,6000  |         |         |
| IEA-S-F  | 7  | 1,9286  |         |         |
| GEA+S-cr | 6  | 2,3333  |         |         |
| IEA+S-cr | 4  | 2,3750  |         |         |
| IEA+S-F  | 5  | 2,6000  |         |         |
| GEA+S-F  | 10 | 2,7500  |         |         |
| GEA-S-F  | 10 | 3,2500  |         |         |
| IEA-S-cr | 7  | 4,7957  | 4,7957  |         |
| IEA+S+cr | 5  | 10,2000 | 10,2000 |         |
| GEA+S+F  | 10 | 11,2000 | 11,2000 |         |
| IEA-S+cr | 6  | 11,9167 | 11,9167 |         |
| IEA-S+F  | 7  | 12,3571 | 12,3571 |         |
| IEA+S+F  | 5  | 12,4000 | 12,4000 |         |
| GEA+S+cr | 11 | 13,2273 | 13,2273 |         |
| GEA-S+F  | 10 |         | 16,9500 |         |
| GEA-S+cr | 9  |         |         | 58,8889 |
| Sig.     |    | ,091    | ,061    | 1,000   |

Means for groups in homogeneous subsets are displayed.

Based on observed means.

The error term is Mean Square(Error) = 41,244.

a. Uses Harmonic Mean Sample Size = 6,628.

b. The group sizes are unequal. The harmonic mean of the group sizes is used. Type I error levels are

- b. The group sizes are unequal. The harmonic mean of the group sizes is used. Type I error levels are not guaranteed.
- c. Alpha = ,05.
